# Supplementary material
Source: PubMed Central journal article supplement (PMC2048797)
Supplement: plntphys_pp.107.103846_1.pdf [file plntphys_pp.107.103846_1.pdf]

|        | <i>accD</i> | <i>rpoB</i> | <i>clpP</i> | <i>rbcL</i> | <i>psbA</i> |
|--------|-------------|-------------|-------------|-------------|-------------|
| WT     | 100         | 100         | 100         | 100         | 100         |
| RpoTp  | 16/25       | 38/15       | 25          | 56          | 18          |
| RpoTmp | 70/74       | 61/68       | 85          | 89          | 74          |

**Table I.** Quantification of plastid precursor RNAs from WT plants and *RPOTp* and *RPOTmp* mutants. The -252 *accD*, -300 *rpoB*, -59 *clpP*, -180 *rbcL* and -77 *psbA* precursor RNAs have been quantified after primer extension and separation of cDNAs on 6% acrylamide/urea gels (see Fig. 4) using the ImageJ software (<http://rsb.info.nih.gov/ij>). Quantities are given as percentage referred to WT RNAs. Values for *accD* and *rpoB* are obtained from two independent experiments.
